# Supplementary material for: The role of buoyancy forcing for northern North Atlantic SST variability across multiple time scales
Source: Copernicus journal article supplement (doi:10.5194/egusphere-2022-959), 2022-10-04
Supplement: Supplementary file 1 [file egusphere-2022-959-supplement.pdf]

## Supplementary information:

# The role of buoyancy forcing for northern North Atlantic SST variability across multiple time scales

Björg Risebrobakken<sup>1</sup>, Mari F. Jensen<sup>2</sup>, Helene R. Langehaug<sup>3</sup>, Tor Eldevik<sup>4</sup>, Anne Britt Sandø<sup>5</sup>, Camille Li<sup>4</sup>, Andreas Born<sup>2</sup>, Erin L. McClymont<sup>6</sup>, Ulrich Salzmann<sup>7</sup>, Stijn De Schepper<sup>1</sup>

<sup>1</sup>NORCE Norwegian Research Center, Bjerknes Centre for Climate Research, Bergen, Norway

<sup>2</sup>Department of Earth Sciences, University of Bergen and Bjerknes Centre for Climate Research, Bergen, Norway

<sup>3</sup>Nansen Environmental and Remote Sensing Center, Bjerknes Centre for Climate Research, Bergen, Norway

<sup>4</sup>Geophysical Institute, University of Bergen and Bjerknes Centre for Climate Research, Bergen, Norway

<sup>5</sup>Institute of Marine Research, Bjerknes Centre for Climate Research, Bergen, Norway

<sup>6</sup>Department of Geography, Durham University, Durham, UK

<sup>7</sup>Department of Geography and Environmental Sciences, Northumbria University, UK

Correspondence to: Björg Risebrobakken ([bjri@norce-research.no](mailto:bjri@norce-research.no))

The information summarized in Table 2 in the paper is based on information extracted from previously published Pliocene records. To keep consistency and allow for direct comparison when comparing this information to the identified phase relations, these previously published records were resampled every 100 ka between 5.23 and 3.13 Ma, using a linear integration function in *AnalySeries* (Paillard et al., 1996), and presented as anomalies relative to the mean of their resampled self (100 ka) (as described in Section 2.1 for ODP sites 982, 642 and 907). This approach allows for direct comparison between sites, independent of differences in temporal resolution and absolute age of the raw data points. The anomaly plots based on the resampled datasets were plotted with the purpose to look at global SSTs, AMOC and ventilation of the deep Nordic seas, tropical SSTs, the Atlantic Equator-to-Pole SST gradient, freshwater and wind forcing (Fig. S1-S6). Only datasets that cover the full interval with a resolution that allowed for a 100-ka resampling were included (Table S1). The location of the included sites is shown in Fig. S7.

Figure S1: Northern Hemisphere meridional SST gradient

Figure S2: Ocean circulation

Figure S3: Globally distributed SST records

Figure S4: Meridional SST gradients based on globally distributed SST records

Figure S5: Tropical SSTs

Figure S6: Atmospheric conditions over Norway, based on pollen from Site 642

Figure S7: Map with site locations indicated

Table S1: Overview of sites used

40

**Figure S1.** Northern Hemisphere meridional SST gradients using data from sites in Table S1. The upper panel shows data restricted to sites from the Atlantic Ocean and the lower panel show data restricted to sites from the Pacific and Indian Ocean. There is only one site with information from the Indian Ocean (marked with the box). The mid panel show all datapoints used for the upper and lower panel. The different coloured lines and dots represent time intervals where the different phase relations are identified (specified in the legend underneath). World Ocean Atlas data is from Locarini et al. (2018).

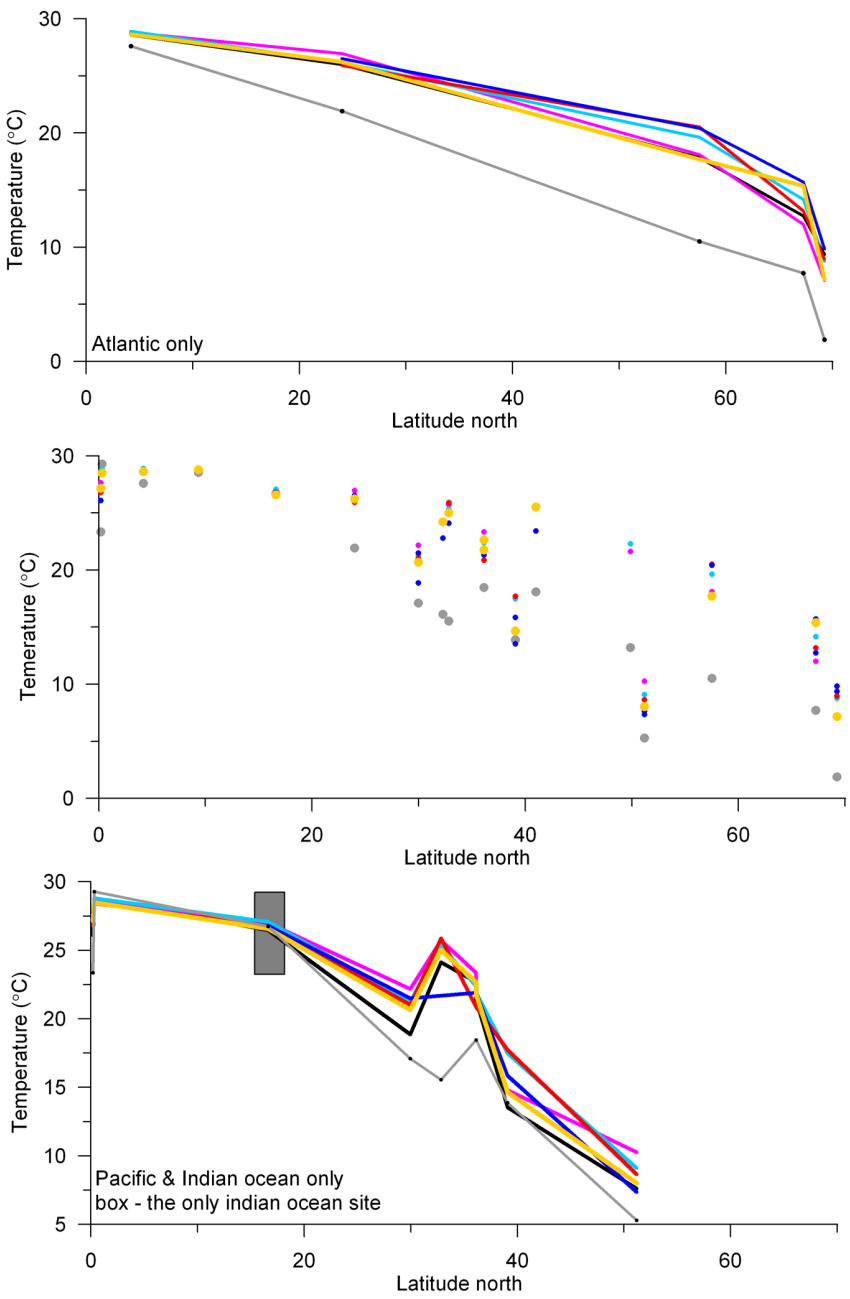

3.23-3.43 Ma Warm Iceland Sea, cold Norwegian Sea and North Atlantic  
3.63-3.93 Ma Warm Norwegian Sea, cold Iceland Sea and North Atlantic  
4.03-4.33 Ma Cold in phase  
4.33-4.63 Ma Warm in phase  
4.73-4.93 Ma Cold Norwegian Sea (cold), warm Iceland Sea and North Atlantic  
5.03-5.23 Ma Warm in phase  
WOA<sub>annual mean, 0-20m</sub>

45

**Figure S2.** The identified Pliocene SST anomalies and phase relations are shown together with planktic and benthic (1286 m water depth) Norwegian Sea/ODP Site 642B  $\delta^{13}\text{C}$  anomalies, benthic  $\delta^{13}\text{C}$  records from ODP Site 607 (red), 704 (blue) and 1264 (grey). The datasets  $\delta^{13}\text{C}$  records from ODP Site 607, 704 and 1264 are used to calculate the percent North Atlantic Deep water (NADW), following (Bell et al., 2015). Grey, yellow and blue boxes along the x-axis represent in-phase, anti-phase between the Norwegian Sea and the North Atlantic and Iceland Sea, and the Iceland Sea in anti-phase with the North Atlantic and Norwegian Sea, respectively.

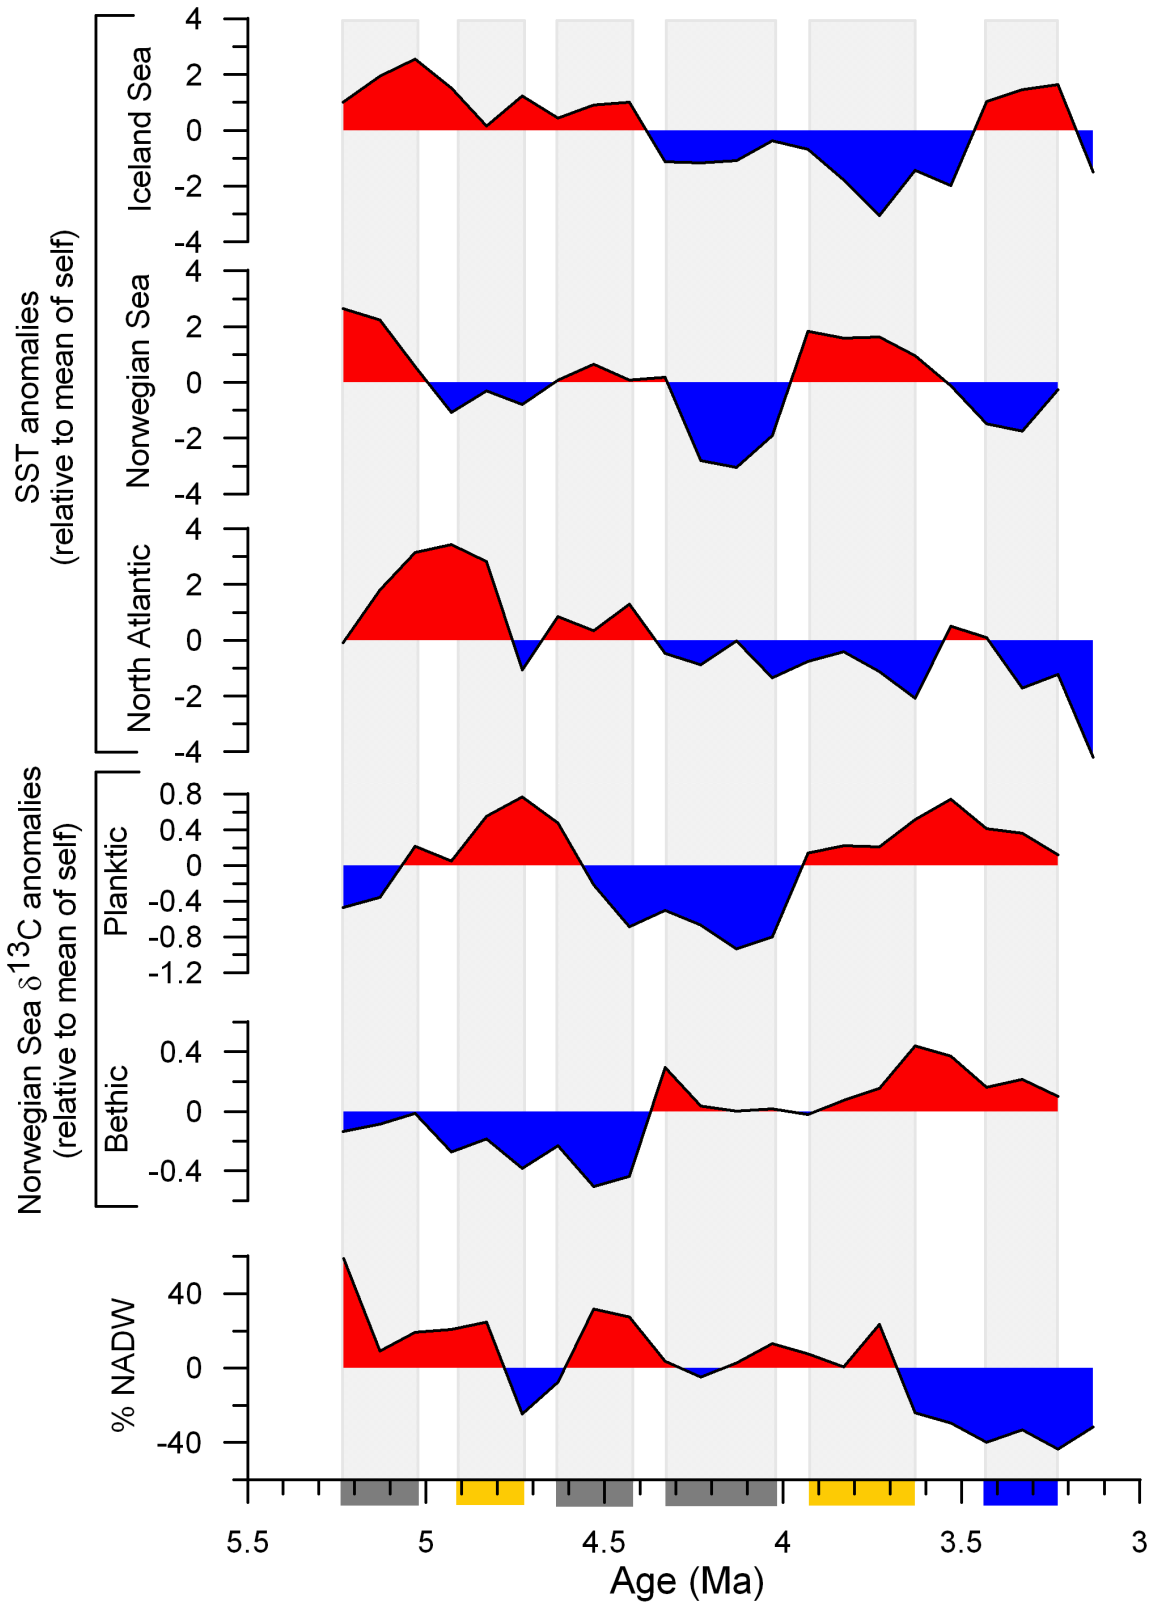

55

60

**Figure S3.** Globally distributed alkenone based SST records (data from sites in Table S1). In the left panel they are presented as anomaly relative to their own mean over the 5.23 to 3.13 Ma interval, based on the 100 ka resampled records. In the right panel absolute values for the 100 ka resampled datasets are shown; here the red fill shows when it was warmer at a specific site relative to WOA<sub>annual</sub> mean 0-20m (Locarini et al., 2018). Grey, yellow and blue boxes along the x-axis of the left panel represent times of in-phase, anti-phase between the Norwegian Sea and the North Atlantic and Iceland Sea, and the Iceland Sea in anti-phase with the North Atlantic and Norwegian Sea, respectively.

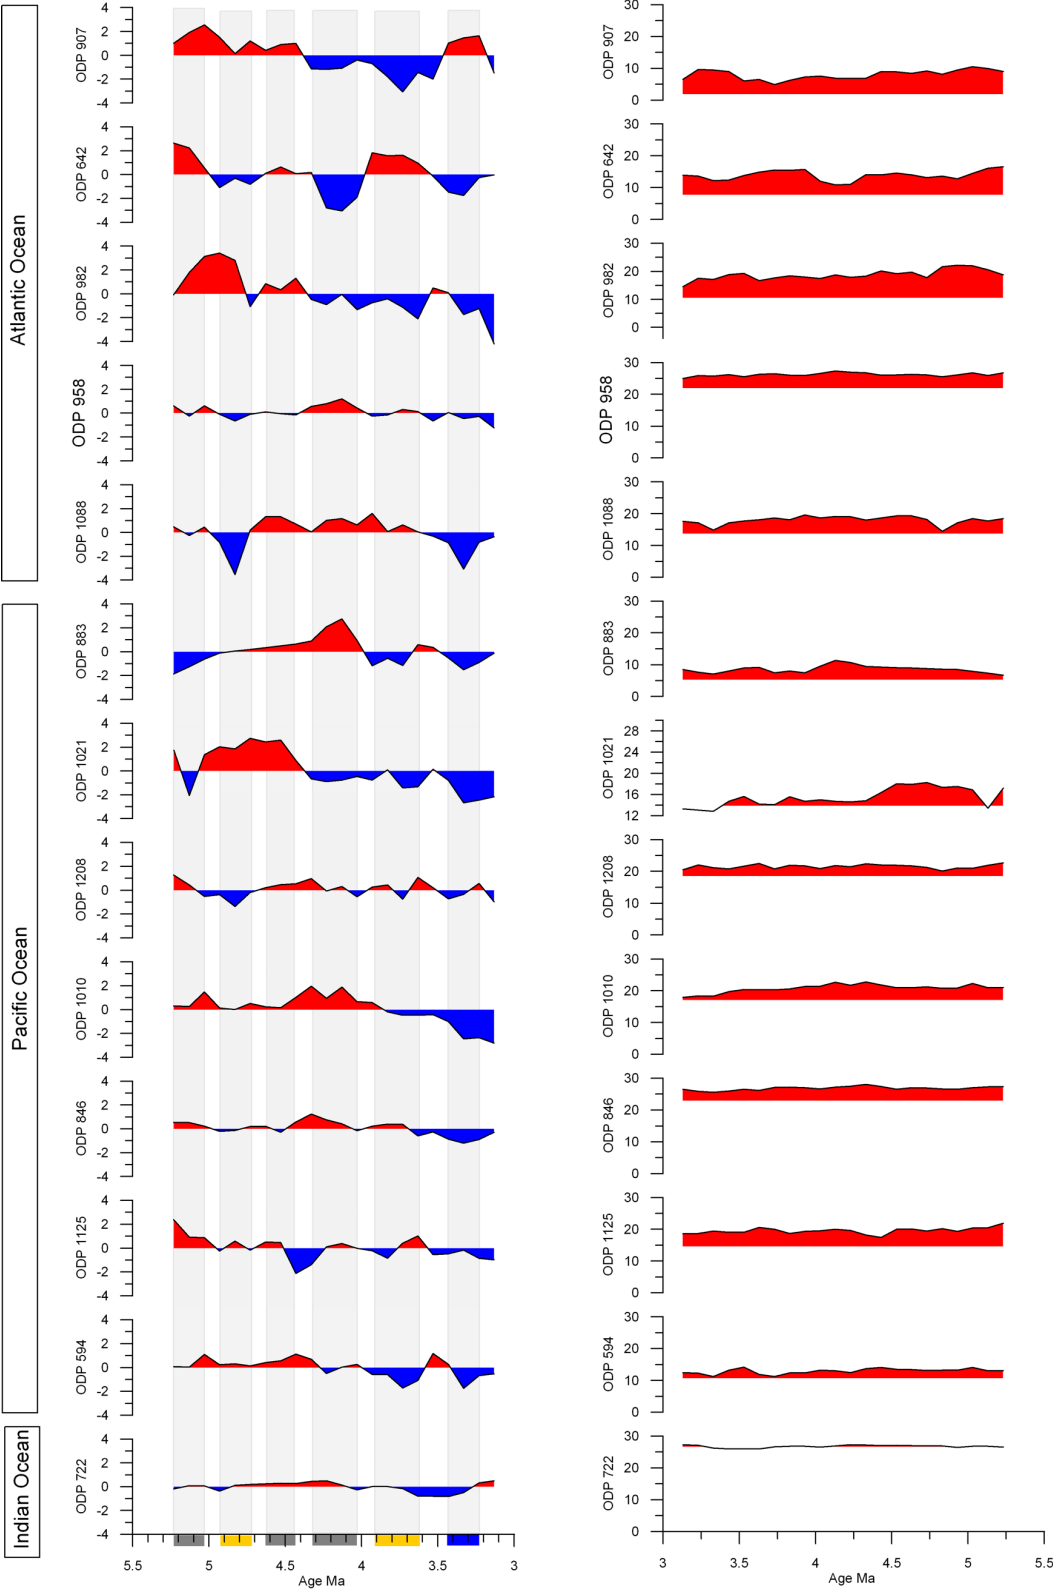

65

**Figure S4.** Meridional SST gradients. The upper panel shows data restricted to sites from the Atlantic Ocean and the lower panel show data restricted to sites from the Pacific and Indian Ocean using data from sites in Table S1. There is only one site with information from the Indian Ocean (marked with the box). The mid panel show all datapoints used for the upper and lower panel. The different coloured lines and dots represent time intervals where the different phase relations are identified (specified in the legend underneath). World Ocean Atlas data is from Locarini et al. (2018).

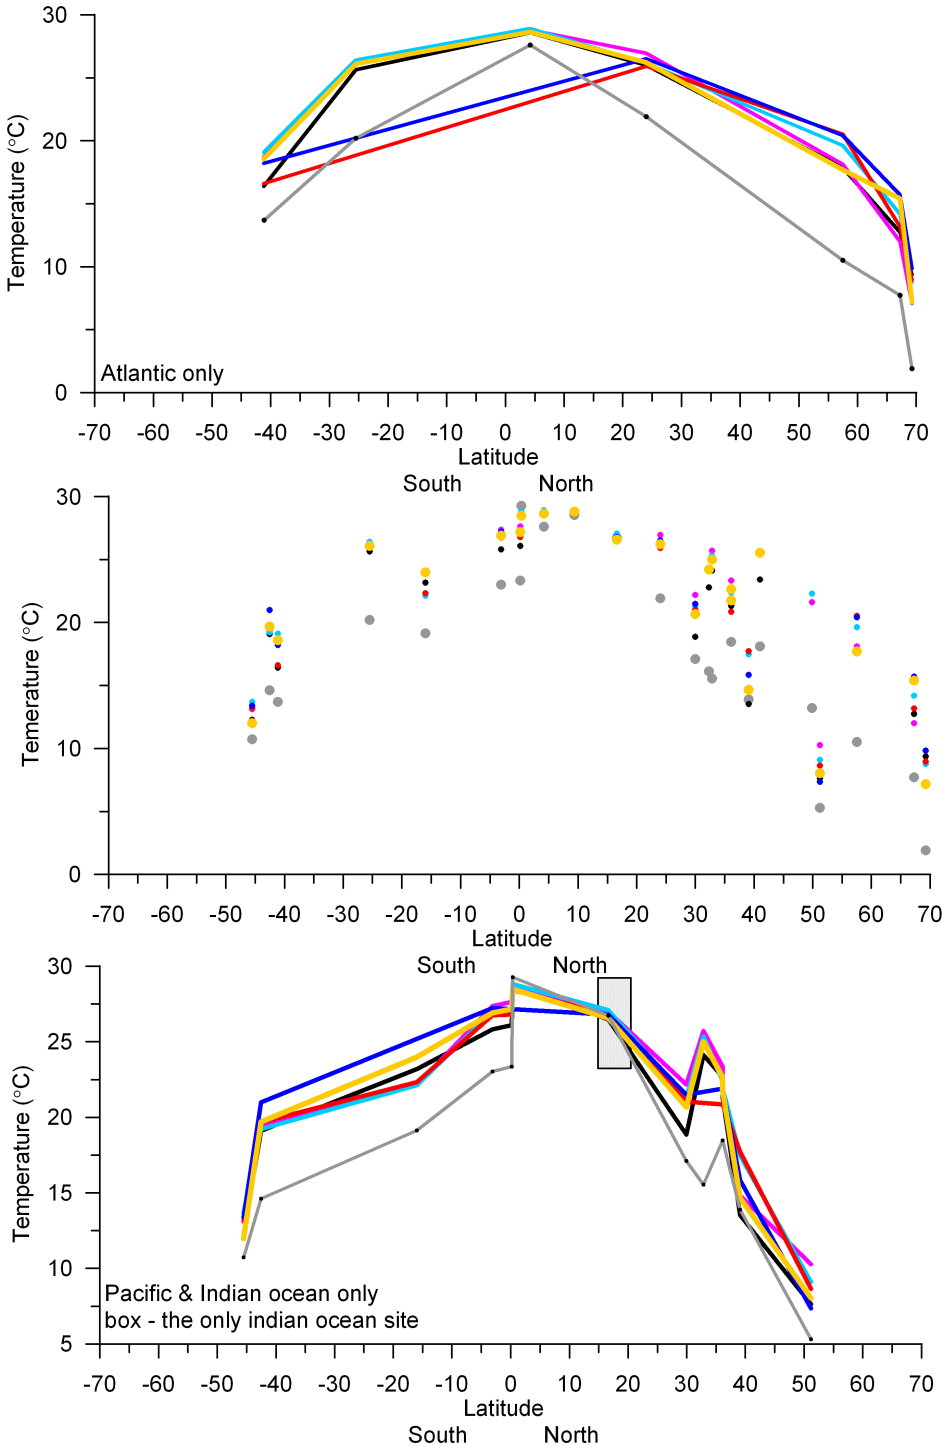

3.23-3.43 Ma Warm Iceland Sea, cold Norwegian Sea and North Atlantic  
3.63-3.93 Ma Warm Norwegian Sea, cold Iceland Sea and North Atlantic  
4.03-4.33 Ma Cold in phase  
4.33-4.63 Ma Warm in phase  
4.73-4.93 Ma Cold Norwegian Sea (cold), warm Iceland Sea and North Atlantic  
5.03-5.23 Ma Warm in phase

WOA<sub>annual mean, 0-20m</sub>

70

**Figure S5.** SST information for tropical sites (between 30°N and 30°S) using data from sites in Table S1. The different coloured dots represent time intervals where the different phase relations are identified (specified in the legend underneath). World Ocean Atlas data is from Locarini et al. (2018).

75

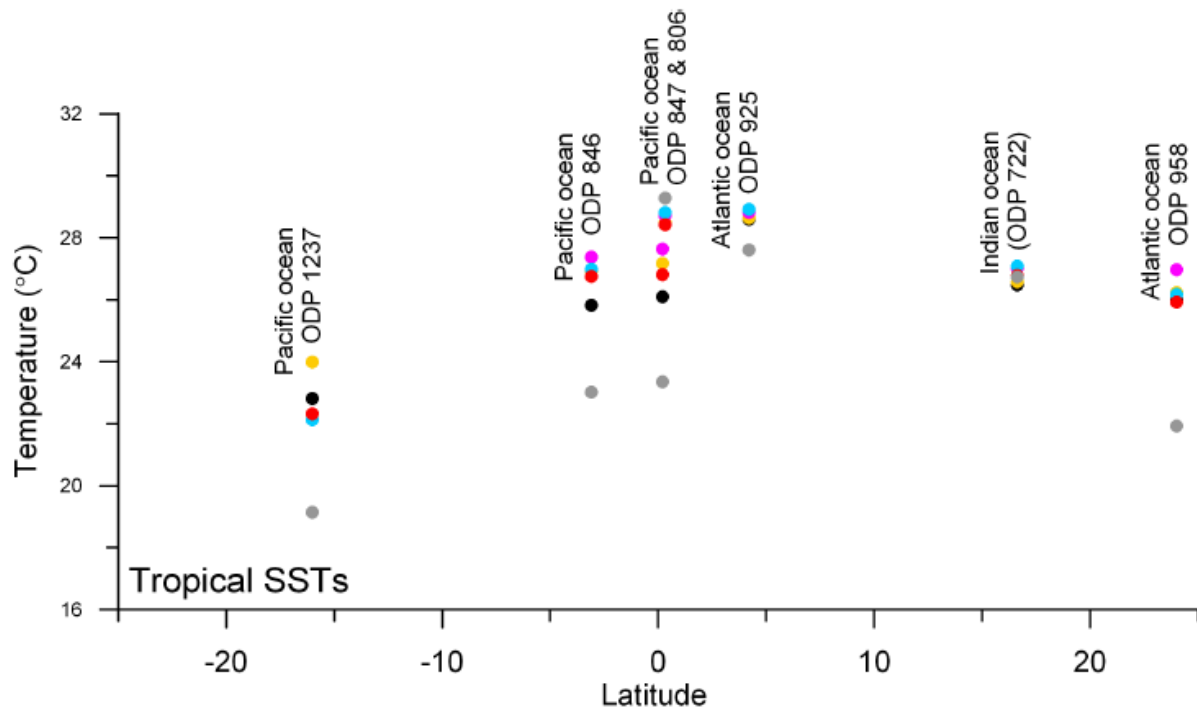

3.23-3.43 Ma Warm Iceland Sea, cold Norwegian Sea and North Atlantic

3.63-3.93 Ma Warm Norwegian Sea, cold Iceland Sea and North Atlantic

4.03-4.33 Ma Cold in phase

4.33-4.63 Ma Warm in phase

4.73-4.93 Ma Cold Norwegian Sea (cold), warm Iceland Sea and North Atlantic

5.03-5.23 Ma Warm in phase

WOA<sub>annual mean, 0-20m</sub>

80

85

**Figure S6.** The upper part of the figure shows the identified Pliocene SST phase relations, with the specific type of relation indicated by the grey, yellow and blue boxes at seen at the x-axis (with grey, yellow and blue boxes representing times of in-phase, anti-phase between the Norwegian Sea and the North Atlantic and Iceland Sea, and the Iceland Sea in anti-phase with the North Atlantic and Norwegian Sea, respectively). The lower part show the relative abundance of selected pollen types, as recorded from ODP Site 642 and interpreted to be representative of climate over Norway, closely connected to the Norwegian Sea SST development (Panitz et al., 2018).

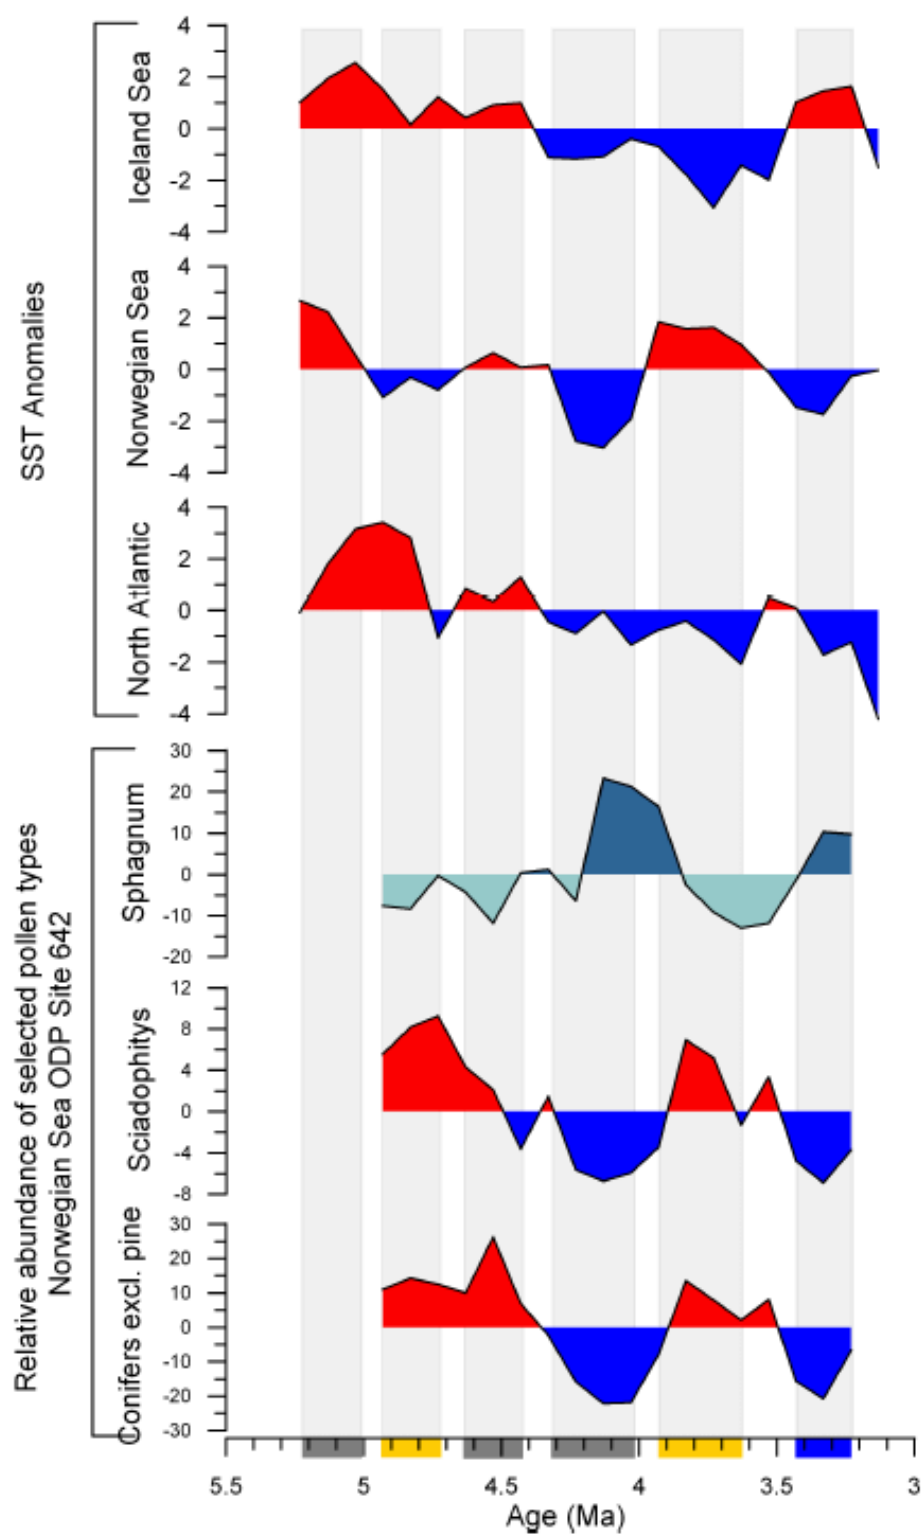

90 **Figure S7.** Map showing the location of sites used for the review of information feeding into Table 2 and shown in Fig. S1-S7. Black circles show locations with alkenone SST datasets. The red circles show the sites from where we have used benthic  $\delta^{13}\text{C}$  datasets to indicate changes in ocean circulation. The base for the map is made with GeoMapApp ([www.geomapapp.org/](http://www.geomapapp.org/)) / [CC BY](#) / CC BY (Ryan et al., 2009)).

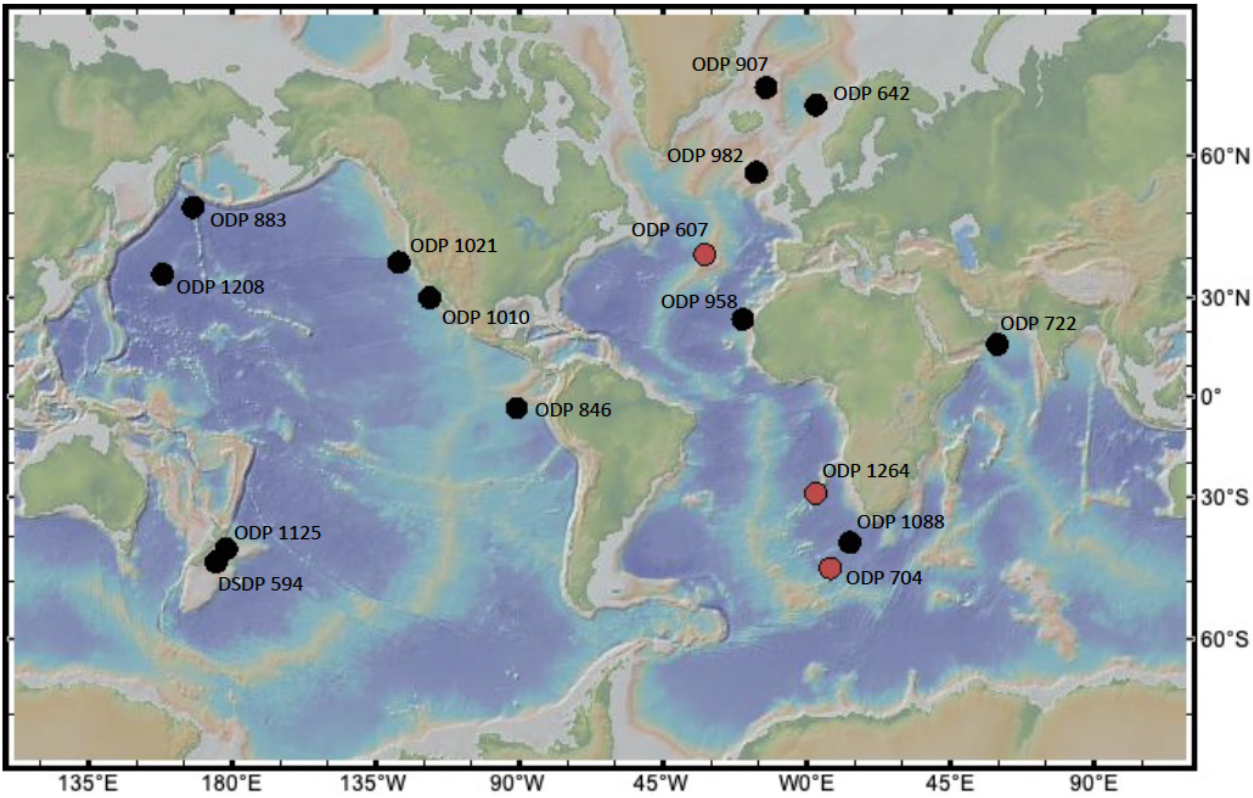



**Table S1.** Overview of sites and records used for Figures S1-S6, and hence feeding into Table 2. Original reference and reference to where we have collected the data is given.

| Area                             | Site     | Latitude  | Longitude | Water depth (m) | Proxy used                                   | Reference                                                                     | Data source                                                                                                                                                                                                            |
|----------------------------------|----------|-----------|-----------|-----------------|----------------------------------------------|-------------------------------------------------------------------------------|------------------------------------------------------------------------------------------------------------------------------------------------------------------------------------------------------------------------|
| >60°N Atlantic                   | ODP 907  | 69.24815  | -12.69    | 1802            | Alkenones                                    | Herbert et al. (2016)                                                         | Herbert et al. (2016)                                                                                                                                                                                                  |
|                                  | ODP 642  | 67.255    | 2.928333  | 1281            | Alkenones<br>$\delta^{13}\text{C}$<br>Pollen | Bachem et al. (2017);<br>Panitz et al. (2018);<br>Risebrobakken et al. (2016) | <a href="https://doi.org/10.1594/PAN_GAEA.865205">https://doi.org/10.1594/PAN_GAEA.865205</a><br><a href="https://doi.org/10.1594/PAN_GAEA.863867">https://doi.org/10.1594/PAN_GAEA.863867</a><br>Panitz et al. (2018) |
| 30-60°N Atlantic                 | ODP 982  | 57.5167   | -15.8667  | 1134            | Alkenones                                    | Herbert et al. (2016);<br>Lawrence et al. (2009)                              | Herbert et al. (2016)                                                                                                                                                                                                  |
|                                  | DSDP 607 | 41.0012   | -31.9573  | 3427            | $\delta^{13}\text{C}$                        | Hodell and Venz-Curtis (2006)                                                 | Hodell and Venz-Curtis (2008)                                                                                                                                                                                          |
| 30-60°N Pacific                  | ODP 1208 | 36.12716  | 158.20158 | 3346            | Alkenones                                    | Lariveire et al. (2012)                                                       | Herbert et al. (2016)                                                                                                                                                                                                  |
|                                  | ODP 1021 | 39.0875   | -127.7832 | 4235            | Alkenones                                    | Lariveire et al. (2012)                                                       | Federov et al. (2013); Herbert et al. (2016)                                                                                                                                                                           |
|                                  | ODP 883  | 51.1983   | 167.7688  | 2396            | Alkenones                                    | Herbert et al. (2016)                                                         | Herbert et al. (2016)                                                                                                                                                                                                  |
| 30°S-30°N Atlantic               | ODP 958  | 23.99895  | -20.00083 |                 | Alkenones                                    | Herbert and Schuffert (1998)                                                  | Federov et al. (2013)                                                                                                                                                                                                  |
|                                  | ODP 1264 | -28.5325  | 2.8455    | 2505            | $\delta^{13}\text{C}$                        | Bell et al. (2014)                                                            | <a href="ftp://ftp.ncdc.noaa.gov/pub/data/paleo/contributions_by_author/bell2014/bell2014-1264.txt">ftp://ftp.ncdc.noaa.gov/pub/data/paleo/contributions_by_author/bell2014/bell2014-1264.txt</a>                      |
| 30°S-30°N Indian Ocean / Pacific | ODP 722  | 16.62187  | 59.79592  | 2028            | Alkenones                                    | Herbert et al. (2010);<br>Huang et al. (2007)                                 | Herbert et al. (2016)                                                                                                                                                                                                  |
|                                  | ODP 846  | -3.094942 | -90.81797 | 3296            | Alkenones                                    | Herbert et al. (2016);<br>Lawrence et al. (2009);<br>Liu and Herbert (2004)   | Federov et al. (2013); Herbert et al. (2016)                                                                                                                                                                           |
|                                  | ODP 1010 | 29.96503  | -118.1008 | 3464            | Alkenones                                    | Lariveire et al. (2012)                                                       | Federov et al. (2013); Herbert et al. (2016)                                                                                                                                                                           |
| 30-60°S Atlantic                 | ODP 1088 | -41.13608 | 13.56285  | 2082            | Alkenones                                    | Herbert et al. (2016)                                                         | Herbert et al. (2016)                                                                                                                                                                                                  |
|                                  | ODP 704  | -46.87975 | 7.420517  | 2532            | $\delta^{13}\text{C}$                        | Hodell and Venz-Curtis (2006)                                                 | Hodell and Venz-Curtis (2008)                                                                                                                                                                                          |
| 30-60°S Pacific                  | ODP 1125 | -42.54967 | 178.1665  | 1365            | Alkenones                                    | Herbert et al. (2016)                                                         | Herbert et al. (2016)                                                                                                                                                                                                  |
|                                  | DSDP 594 | -45.5235  | 174.948   | 1204            | Alkenones                                    | Herbert et al. (2016)                                                         | Herbert et al. (2016)                                                                                                                                                                                                  |

## 100 References

- Bachem, P. E., Risebrobakken, B., De Schepper, S., and McClymont, E. L.: Highly variable Pliocene sea surface conditions in the Norwegian Sea, *Clim. Past.*, 13, 1153-1168, <https://doi.org/10.5194/cp-1113-1153-2017>, 2017.
- Bell, D. B., Jung, S. J. A., Kroon, D., Lourens, L. J., and Hodell, D. A.: Local and regional trends in Plio-Pleistocene  $\delta^{18}\text{O}$  records from benthic foraminifera, *Geochem. Geophys. Geosyst.*, 15, 3304-3321, doi:10.1002/2014GC005297, 2014.
- Bell, D. B., Jung, S. J. A., Kroon, D., Hodell, D. A., Lourens, L. J., and Raymo, M. E.: Atlantic Deep-water Response to the Early Pliocene Shoaling of the Central American Seaway, *Scientific Reports*, 5, 12252, doi:10.1038/srep12252, 2015.
- Federov, A. V., Brierley, C., Lawrence, K. T., Liu, Z., Dekens, P. S., and Ravelo, A. C.: Patterns and mechanisms of early Pliocene warmth, *Nature*, 496, 43-52, 2013.
- Herbert, T. D. and Schuffert, J. D.: Alkenone unsaturation estimates of late Miocene through late Pliocene sea surface temperature change, ODP site 958, *Proc. ODP Sci. Res.*, 159T, 17-22, 1998.
- Herbert, T. D., Cleaveland Peterson, L., Lawrence, K. T., and Liu, Z.: Tropical ocean temperature over the past 3.5 million years, *Science*, 328, 1530-1534, 2010.
- Herbert, T. D., Lawrence, K. T., Tzanova, A., Peterson, L. C., Caballero-Gill, R., and Kelly, C. S.: Late Miocene global cooling and the rise of modern ecosystems, *Nature Geoscience*, 9, 843-849, 2016.
- Hodell, D. A. and Venz-Curtis, K. A.: Late Neogene history of deepwater ventilation in the Southern Ocean., *Geochemistry, Geophysics, Geosystems*, 7, Q09001, doi:10.1029/2005GC001211, 2006.
- Hodell, D. A. and Venz-Curtis, K. A.: Late Neogene Southern Ocean Carbon Isotope Data. [dataset], 2008.
- Huang, Y., Clemens, S. C., Liu, W., Wang, Y., and Prell, W. L.: Large-scale hydrological change drove the late Miocene C4 plant expansion in the Himalayan foreland and Arabian Peninsula, *Geology*, 35, 531-534, <https://doi.org/10.1130/G23666A.23661>, 2007.
- LaRiveire, J. P., Ravelo, A. C., Crimmins, A., Dekens, P. S., Ford, H. L., Lyle, M., and Wara, M. W.: Late Miocene decoupling of oceanic warmth and atmospheric carbon dioxide forcing, *Nature*, 486, 97-100, doi:10.1038/nature11200, 2012.
- Lawrence, K. T., Herbert, T. D., Brown, C. W., Raymo, M., and Haywood, A. M.: High-amplitude variations in North Atlantic sea surface temperature during the early Pliocene warm period, *Paleoceanography*, 24, PA2218, doi:10.1029/2008PA001669, 2009.

- 130 Liu, Z. and Herbert, T. D.: High-latitude influence on the eastern equatorial Pacific climate in the early Pleistocene epoch, *Nature*, 427, 720-723, 2004.
- Locarini, R. A., Mishonov, A. V., Baranova, O. K., Boyer, T. P., Zweng, M. M., Garcia, H. E., Reagan, J. R., Seidov, D., Weathers, K., Paver, C. R., and Smolyar, I.: *World Ocean Atlas 2018, Volume 1: Temperature*, 52, 2018.
- Paillard, D., Labeyrie, L., and Yiou, P.: Macintosh program performs time-series analysis, *EOS, Trans. AGU, TI*, 379, 1996.
- 135 Panitz, S., Salzmann, U., Risebrobakken, B., De Schepper, S., Pound, J. M., Haywood, A., Dolan, A. M., and Lunt, D.: Orbital, tectonic and oceanographic control of Pliocene climate and atmospheric circulation in Arctic Norway, *Global Planetary Change*, 161, 183-193, 2018.
- Risebrobakken, B., Andersson, C., De Schepper, S., and McClymont, E. L.: Low-frequency Pliocene climate variability in the eastern Nordic Seas, *Paleoceanography*, 31, doi:10.1002/2015PA002918, 2016.
- 140 Ryan, W. B. F., Carbotte, S. M., Coplan, J., O'Hara, S., Melkonian, A., Arko, R., Weissel, R. A., Ferrini, V., Goodwillie, A., Nitsche, F., Bonczkowski, J., and Zemsky, R.: Global Multi-Resolution Topography (GMRT) synthesis data set, *Geochem. Geophys. Geosyst.*, 10, Q003014, doi:03010.01029/02008GC002332, 2009.
